**Full title:** Exploring the power of structural brain MRI and clinical measures in predicting AD neuropathology: a machine learning approach

**Running title:** Predicting neuropathology based on MRI and clinical features

Farooq Kamal<sup>1,2</sup>, Cassandra Morrison<sup>3</sup>, Michael D. Oliver<sup>4,5</sup> (PhD), Mahsa Dadar<sup>1,2</sup>

<sup>1</sup>Department of Psychiatry, McGill University, Montreal, Quebec, H3A 1A1, Canada

<sup>2</sup>Douglas Mental Health University Institute, Montreal, Quebec, H4H 1R3, Canada

<sup>3</sup>Department of Psychology, Carleton University, Ottawa, Ontario, K1S 5B6, Canada

<sup>4</sup>Department of Psychological Science and Neuroscience, Belmont University, Nashville, Tennessee, United States

<sup>5</sup>Belmont Data Collaborative, Belmont University, Nashville, Tennessee, United States

\*\*The authors have withdrawn their manuscript owing to data access requirements. Therefore, the authors do not wish this work to be cited as reference for the project. If you have any questions, please contact the corresponding author.
